# Supplementary material
Source: HighWire-hosted journal article supplement (https://openheart.bmj.com/content/9/2/e002113)
Supplement: inline-supplementary-material-3 [file inline-supplementary-material-3.pdf]

**Supplemental table 1: Crossing technique in relation to MACCE.**

| Group                                             | ≥5x ULN          |         |                  | ≥35x ULN         |         |                |
|---------------------------------------------------|------------------|---------|------------------|------------------|---------|----------------|
|                                                   | No               | MACCE   | <i>p</i> value   | No               | MACCE   | <i>p</i> value |
| Variable                                          | MACCE<br>(n=665) | (n=60)  |                  | MACCE<br>(n=538) | (n=41)  |                |
| <i>Successful crossing technique (individual)</i> |                  |         | <b>&lt;0.001</b> |                  |         | <b>0.019</b>   |
| Crossing failure                                  | 119 (18)         | 23 (38) |                  | 93 (17)          | 15 (37) |                |
| AWE                                               | 424 (64)         | 25 (42) |                  | 363 (68)         | 19 (46) |                |
| ADR                                               | 61 (9)           | 2 (3)   |                  | 42 (8)           | 2 (5)   |                |
| RWE                                               | 23 (4)           | 5 (8)   |                  | 15 (3)           | 2 (5)   |                |
| RDR                                               | 38 (6)           | 5 (8)   |                  | 25 (5)           | 3 (7)   |                |
| <i>Successful crossing technique</i>              |                  |         | <b>&lt;0.001</b> |                  |         | <b>0.006</b>   |
| Crossing failure                                  | 119 (18)         | 23 (38) |                  | 93 (17)          | 15 (37) |                |
| AWE                                               | 424 (64)         | 25 (42) |                  | 363 (68)         | 19 (46) |                |
| Combined<br>(ADR/RWE/RDR)                         | 122 (18)         | 12 (20) |                  | 82 (15)          | 7 (17)  |                |

Values expressed as n(%).
